# Supplementary material for: One-step fabrication of Cu-based metal organic framework multilayer core–shell microspheres for efficiently catalyzing the oxygen reduction reaction
Source: Royal Society of Chemistry journal article supplement (doi:10.1039/d2dt00324d), 2022-01-01
Supplement: d2dt00324d1.pdf [file d2dt00324d1.pdf]

## One-step fabrication of Cu-based metal organic framework multilayer core-shell microspheres for efficiently catalyzing oxygen reduction reaction

Ping Liu <sup>a</sup>, Jia Wang <sup>a</sup>, Jie Bai <sup>a</sup>, Yifei Ma <sup>b</sup>, Sihan Lu <sup>a</sup>, Nini Ma <sup>a</sup>, Shujun Chao <sup>a,\*</sup>

\*

<sup>a</sup> Key Laboratory of Medical Molecular Probes, School of Basic Medical Sciences, Xinxiang Medical University, Xinxiang 453003, P. R. China

<sup>b</sup> Henan Chilwee Genshore Power Co., Ltd, Qinyang 454550, P. R. China.

E-mail address: chaoshujun1979@163.com (S. Chao).

Tel: +86-373-3029128; fax: +86-373-3029128.

### Supplementary Information

#### Contents

**Fig. S1** XPS survey spectra of Cu-MOF-MSs, Cu-MOF-CSMSs and Cu-MOF-MCSMSs.

**Fig. S2** XRD patterns (a) and XPS survey spectra (b) of B-Co-MOFs, F-Ni-MOFs, Cu-MOF-1-MSs and Cu-MOF-2-MSs.

**Fig. S3** N<sub>2</sub> sorption isotherms and pore size distribution curves of B-Co-MOFs (a and e), F-Ni-MOFs (b and f), Cu-MOF-1-MSs (c and g) and Cu-MOF-2-MSs (d and h).

**Table S1.** List of ORR performance of some reported Cu-based catalysts. All measured potentials were normalized to the RHE scale.

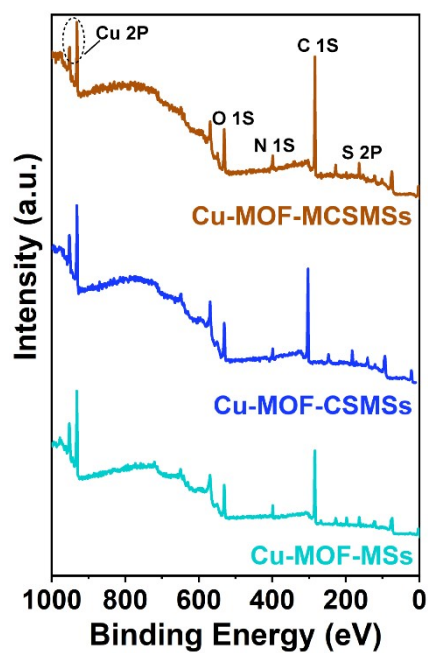

**Fig. S1** XPS survey spectra of Cu-MOF-MSs, Cu-MOF-CSMSs and Cu-MOF-MCSMSs.

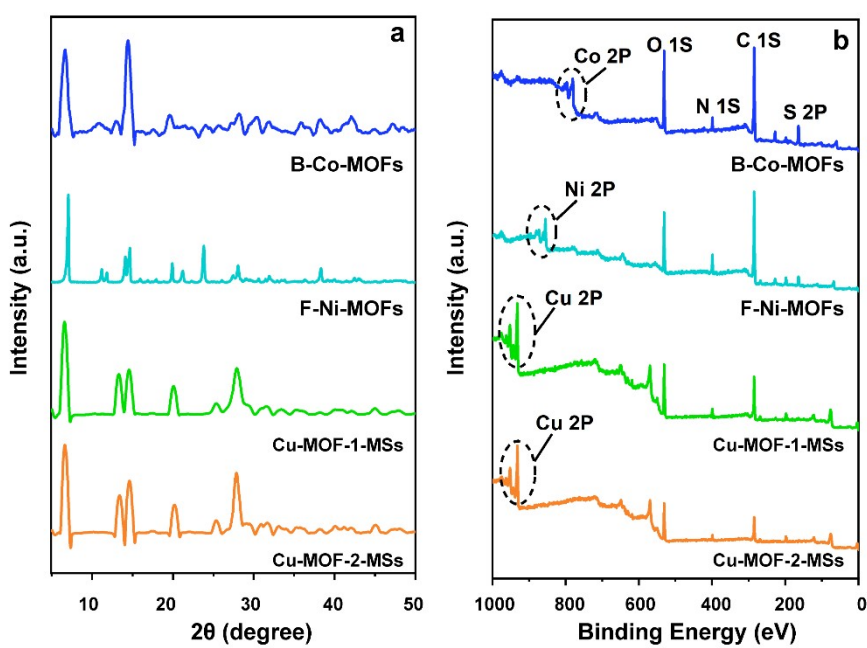

**Fig. S2** XRD patterns (a) and XPS survey spectra (b) of B-Co-MOFs, F-Ni-MOFs, Cu-MOF-1-MSs and Cu-MOF-2-MSs.

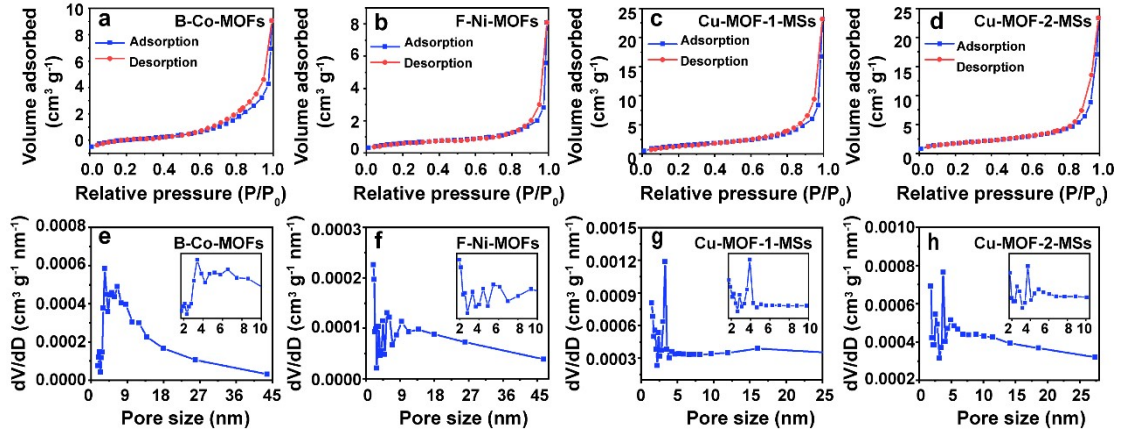

**Fig. S3**  $N_2$  sorption isotherms and pore size distribution curves of B-Co-MOFs (a and e), F-Ni-MOFs (b and f), Cu-MOF-1-MSs and Cu-MOF-1-MSs (d and h).

**Table S1.** List of ORR performance of some reported Cu-based catalysts. All measured potentials were normalized to the RHE scale.

| Material                  | $E_O$ / V (vs. RHE) | $E_{1/2}$ / V (vs. RHE) | Electrolyte | Reference |
|---------------------------|---------------------|-------------------------|-------------|-----------|
| Cu-MOF-MCSMSs             | 0.88                | 0.76                    | 0.1 M KOH   | This work |
| Cu-PPYTZ/C                | 0.72                | 0.48                    | PBS (pH=7)  | 1         |
| FeCu <sub>1.0</sub> @NC   | 0.88                | 0.69                    | 0.1 M KOH   | 2         |
| Cu-N <sub>x</sub> /C      | 0.78                | 0.76                    | 0.1 M KOH   | 3         |
| Nano-CuS(8.8 wt %>@Cu-BTC | 0.85                | 0.67                    | 0.1 M KOH   | 4         |
| Cu-CTF/CP                 | 0.81                | 0.63                    | PBS (pH=7)  | 5         |
| Cu-MOF@mc                 | 0.87                | 0.60                    | 0.1 M KOH   | 6         |

## References

1. L. Gu, Y. Dong, H. Du, Y. Zhang, Q. Yuan, B. Wang, H. Wang, J. Zhao and N. Zhang, *Catal. Surv. Asia*, 2020, **24**, 219-231.
2. X. Chen, R. Qin, Z. Li, S. Shan, Y. Liu and C. Yang, *Mol. Catal.*, 2021, **500**, 111330.
3. Q. He, X. Yang, R. He, A. Bueno-López, H. Miller, X. Ren, W. Yang and B. E. Koel, *J. Power Sources*, 2012, **213**, 169-179.

4. K. Iwase, T. Yoshioka, S. Nakanishi, K. Hashimoto and K. Kamiya, *Angew. Chem. Int. Ed.*, 2015, **54**, 11068-11072.
5. K. Cho, S. H. Han and M. P. Suh, *Angew. Chem. Int. Ed.*, 2016, **55**, 15301-15305.
6. S. A. M. Rizvi, N. Iqbal, M. D. Haider, T. Noor, R. Anwar and S. Hanif, *Catal. Lett.*, 2020, **150**, 1397-1407.
